# Supplementary material for: Luminescence dynamics and enhancement of the UV and visible emissions of Tm3+ in LiYF4:Yb3+,Tm3+ upconverting nanoparticles
Source: Royal Society of Chemistry journal article supplement (doi:10.1039/c9na00556k), 2019-01-01
Supplement: c9na00556k1.pdf [file c9na00556k1.pdf]

## Supporting Information - Luminescence Dynamics and Enhancement of the UV and Visible Emissions of Tm<sup>3+</sup> in LiYF<sub>4</sub>: Yb<sup>3+</sup>, Tm<sup>3+</sup> Upconverting Nanoparticles

*Steven L. Maurizio, Gabriella Tessitore, Gabrielle A. Mandl, John A. Capobianco\**

Department of Chemistry and Biochemistry and Centre for NanoScience Research, Concordia University  
7141 Sherbrooke St. W. Montreal, Quebec, Canada, H4B 1R6

| Ion              | Nominal Tm <sup>3+</sup> Concentration |                       |                       |                       |
|------------------|----------------------------------------|-----------------------|-----------------------|-----------------------|
|                  | 0.1% Tm <sup>3+</sup>                  | 0.2% Tm <sup>3+</sup> | 0.4% Tm <sup>3+</sup> | 0.5% Tm <sup>3+</sup> |
| Y <sup>3+</sup>  | 71.12 ± 3.55%                          | 72.15 ± 3.60%         | 71.68 ± 3.58%         | 73.80 ± 3.72%         |
| Tm <sup>3+</sup> | 0.08 ± 0.00%                           | 0.24 ± 0.01%          | 0.46 ± 0.02%          | 0.55 ± 0.03%          |
| Yb <sup>3+</sup> | 28.80 ± 1.44%                          | 27.61 ± 1.38%         | 27.86 ± 1.40%         | 25.65 ± 1.44%         |

**Table S1** Inductively coupled plasma – mass spectrometry (ICP-MS) measured ionic concentration of Y<sup>3+</sup>, Tm<sup>3+</sup> and Yb<sup>3+</sup> in UCNP compositions studied.

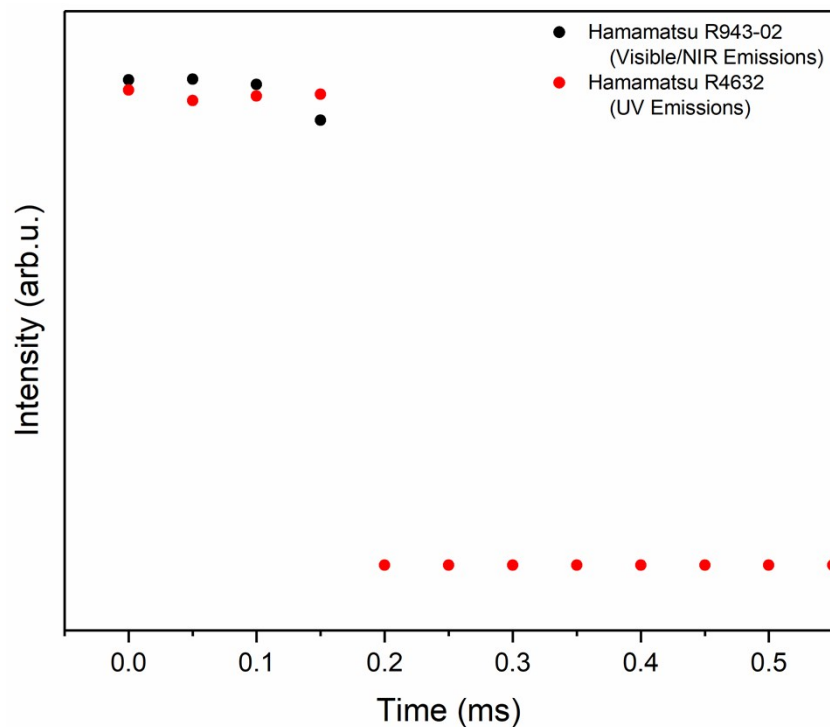

**Fig. S1** Instrument response functions of the PMTs used in this work for 976 nm excitation with a 200  $\mu$ s pulse width.

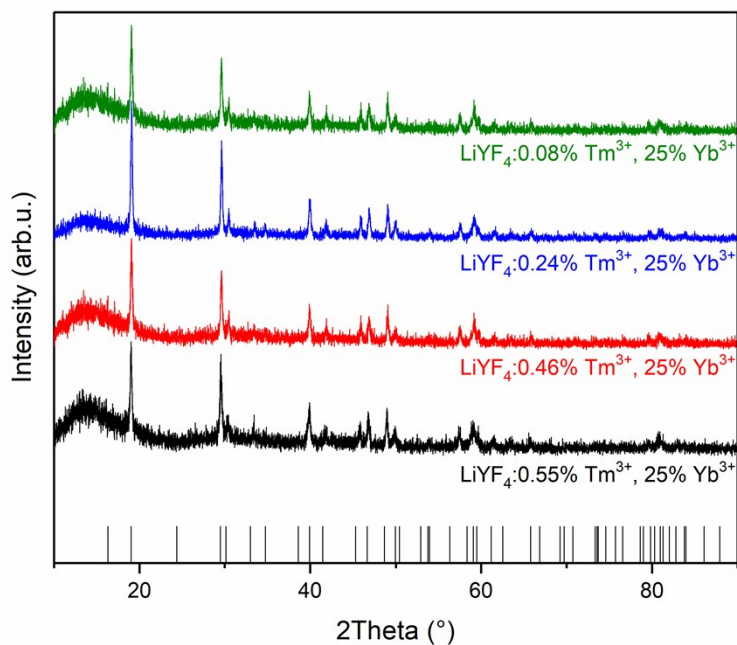

**Fig. S2** Powder X-ray diffraction (PXRD) patterns for different UCNPs compositions studied, compared to the theoretical pattern for the tetragonal phase with space group *I4<sub>1</sub>/a*.<sup>S1</sup>

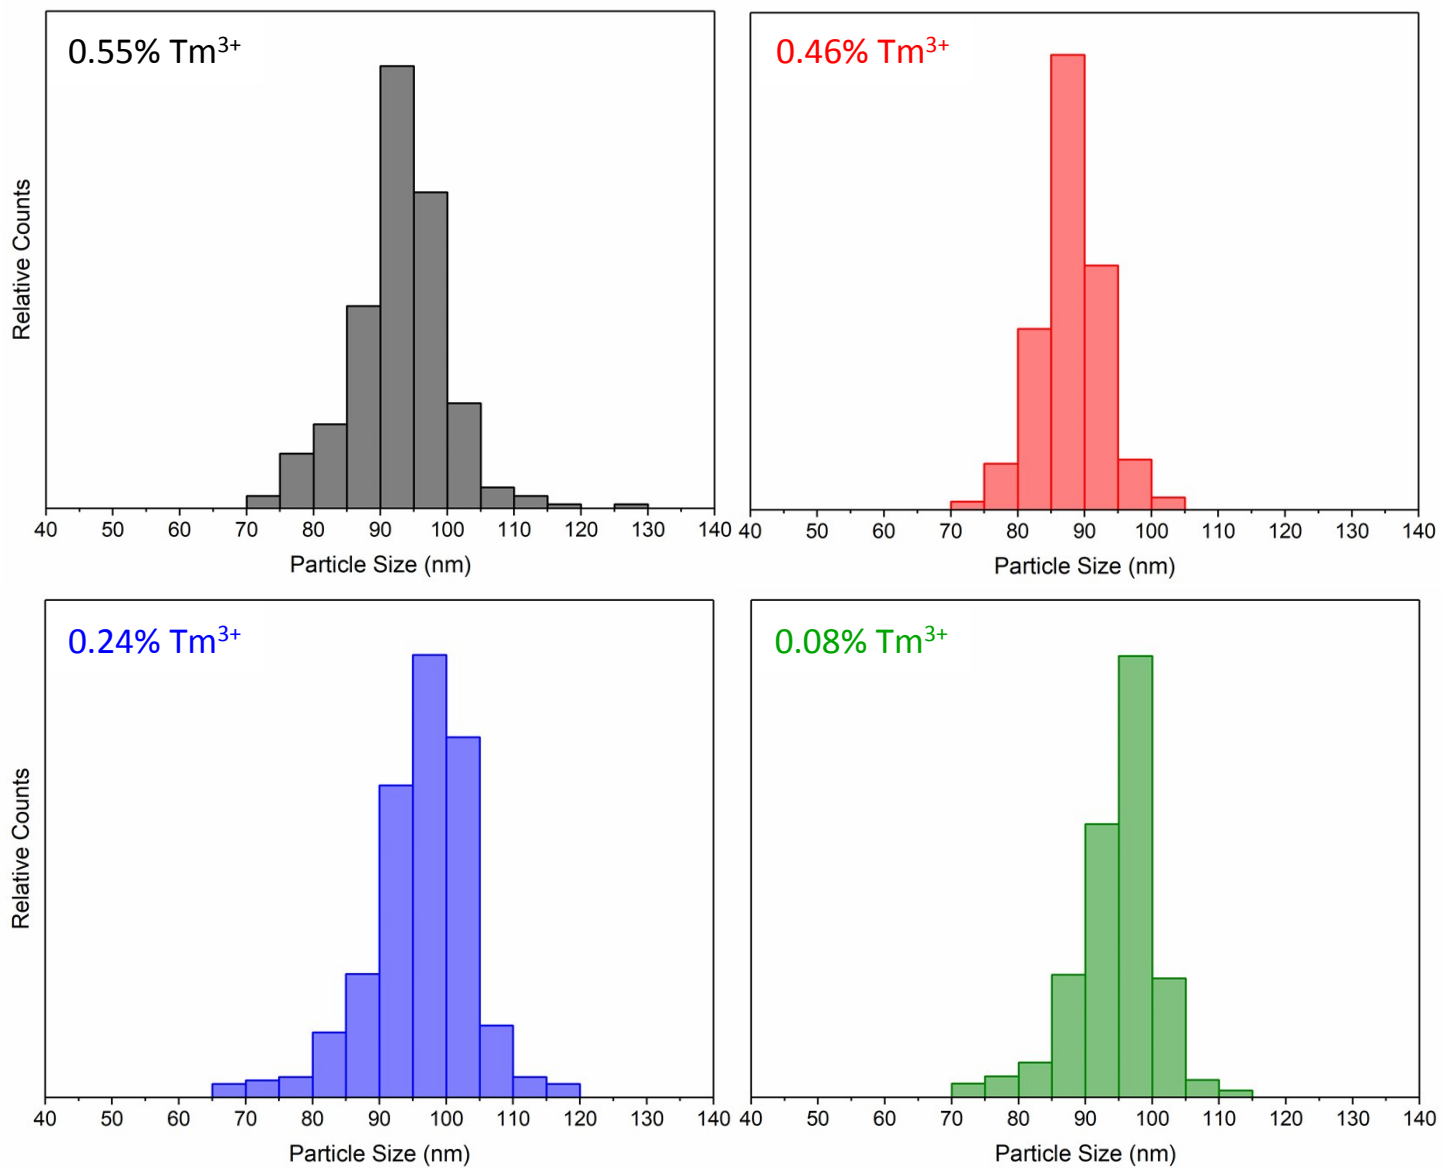

**Fig. S3** Particle size distributions for the compositions studied in this work, measured from 300 nanoparticles.

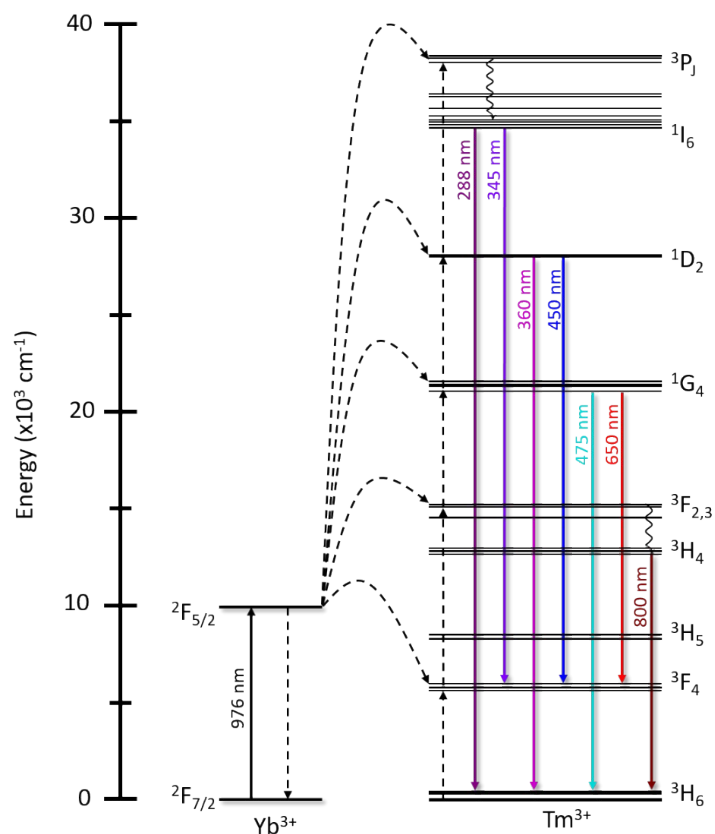

**Fig. S4** Energy level diagram depicting energy transfer upconversion between Yb<sup>3+</sup> and Tm<sup>3+</sup>.<sup>S2</sup>

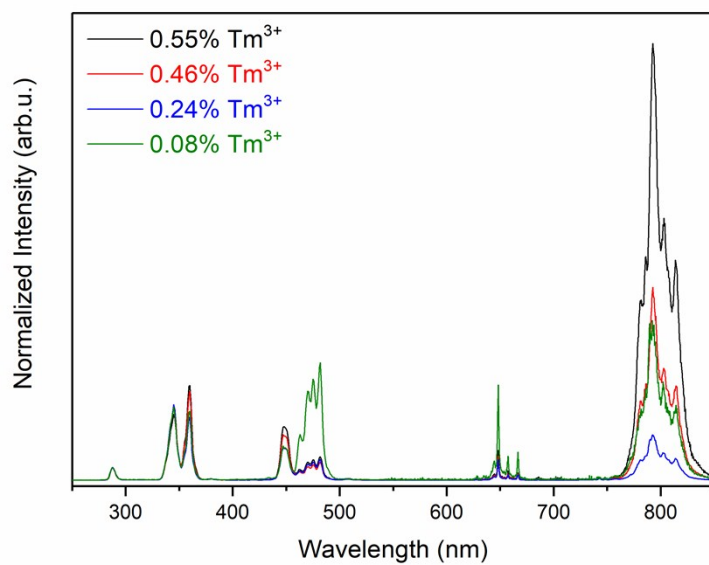

**Fig. S5** Emission spectra for LiYF<sub>4</sub>: 25% Yb<sup>3+</sup>, x% Tm<sup>3+</sup> after 976 nm excitation, normalized to the <sup>1</sup>I<sub>6</sub> transitions.

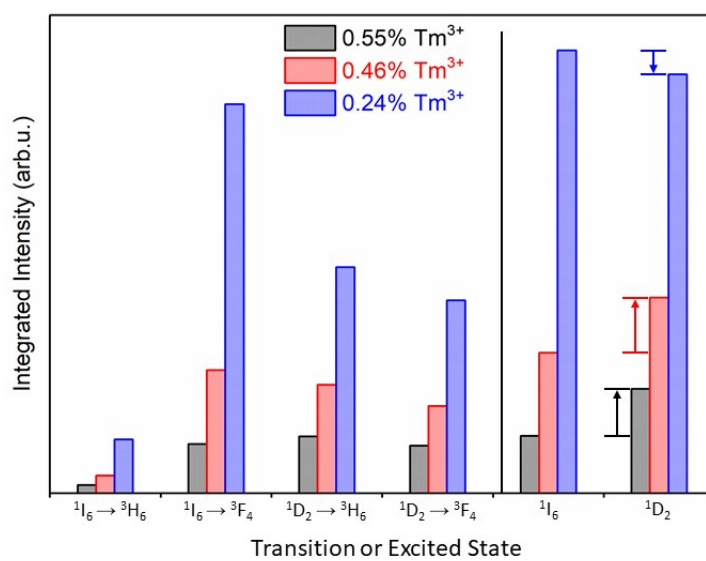

**Fig. S6** Integrated emission intensities for each <sup>1</sup>I<sub>6</sub> and <sup>1</sup>D<sub>2</sub> transition, as well as the sum for each excited state.

Rise and Decay times were calculated using **Equations S1 and S2**, respectively.<sup>S3,S4</sup>

$$\tau_r = \frac{1}{I_{max}} \int_0^{I_{max}} f(t) dt \quad (S1)$$

$$\tau_d = \frac{1}{I_{max}} \int_{I_{max}}^{\infty} f(t) dt \quad (S2)$$

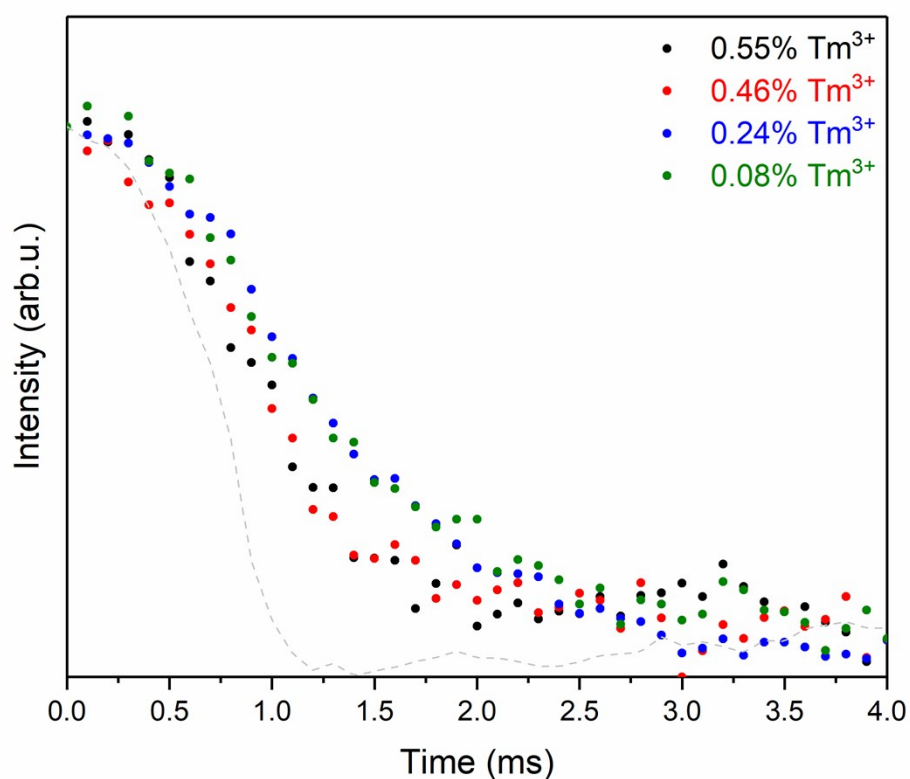

**Fig. S7** Luminescence decay curves for LiYF<sub>4</sub>: 25% Yb<sup>3+</sup>, x% Tm<sup>3+</sup> UCNP for the Yb<sup>3+</sup> <sup>2</sup>F<sub>5/2</sub> → <sup>2</sup>F<sub>7/2</sub> transition (1030 nm) after a pulse of 976 nm excitation. The instrument response curve is reported as a dashed gray line for reference.

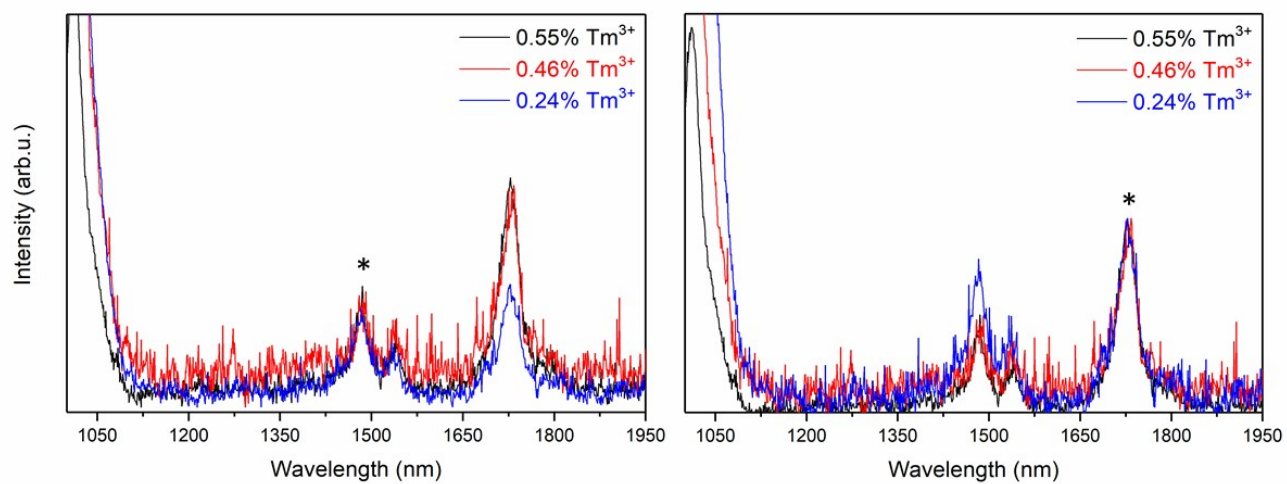

**Fig. S8** NIR emission spectrum for LiYF<sub>4</sub>: 25% Yb<sup>3+</sup>, x% Tm<sup>3+</sup> UCNPs after 976 nm excitation, normalized to the (A) <sup>3</sup>F<sub>4</sub> → <sup>3</sup>H<sub>6</sub> and (B) <sup>3</sup>H<sub>4</sub> → <sup>3</sup>F<sub>4</sub> emissions of Tm<sup>3+</sup>, indicated by the asterisks.

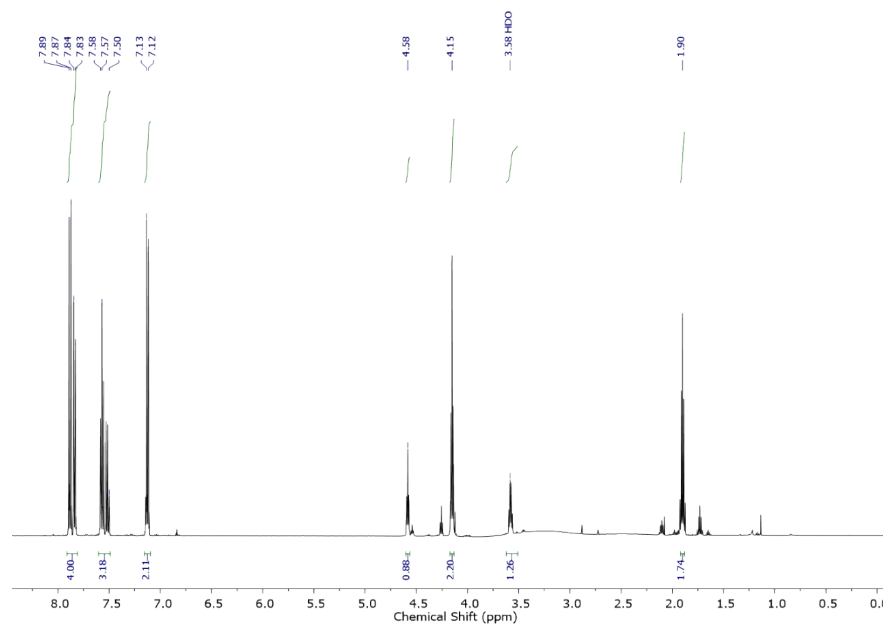

**Fig. S9**  $^1\text{H-NMR}$  spectrum for *trans*-3-(4-phenylazophenoxy)propanol. Resulting shifts interpreted as followed: 1.90 ppm (m, 2H), 3.58 ppm (m, 1H), 4.15 ppm (m, 2H), 4.58 ppm (m, 1H), 7.12 (m, 2H), 7.57 (m, 3H), 7.85 ppm (m, 4H).<sup>S5</sup>

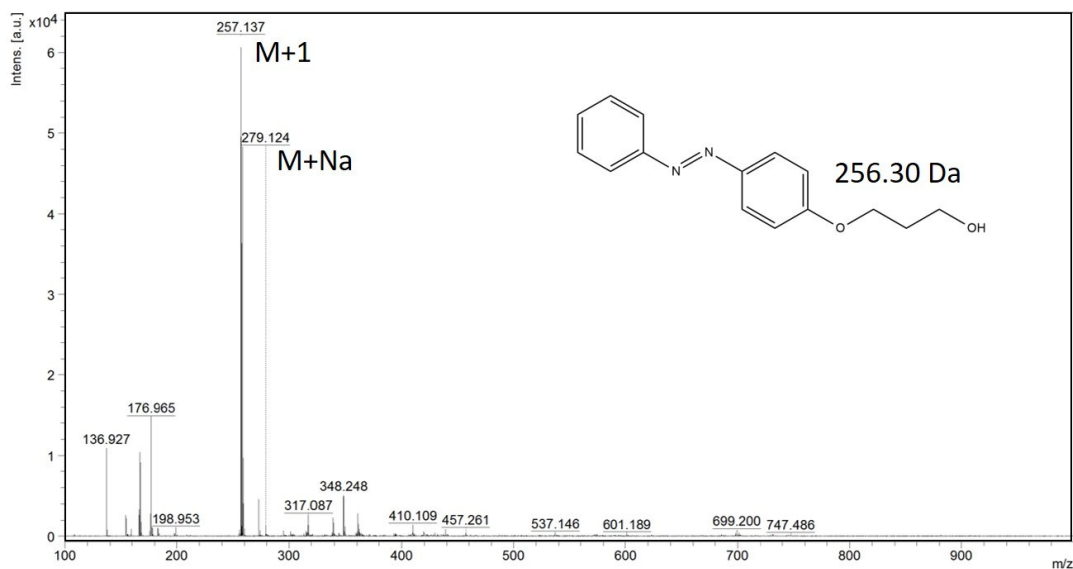

**Fig. S10** Mass spectrometry results for *trans*-3-(4-phenylazophenoxy)propanol. Resulting peaks interpreted as followed: M+1 (257.137 m/z), M+Na (279.124 m/z).<sup>S5</sup>



## References

- S1. A. Braud, S. Girard, J. L. Doualan, M. Thuau, R. Moncorgé and A. M. Tkachuk, *Phys. Rev. B*, 2000, **61**, 5280–5292.
- S2. V. Mahalingam, F. Vetrone, R. Naccache, A. Speghini and J. A. Capobianco, *Adv. Mater.*, 2009, **21**, 4025–4028.
- S3. J. N. Demas, *Excited State Lifetime Measurements*, Academic Press, Inc., New York, 1983.
- S4. S. P. Chan, Z. J. Fuller, J. N. Demas and B. A. DeGraff, *Anal. Chem.*, 2001, **73**, 4486–4490.
- S5. G. A. Mandl, P. A. Rojas-Gutierrez and J. A. Capobianco, *Chem. Commun.*, 2018, **54**, 5847–5850.
